# Supplementary material for: ERBB2 Regulates MED24 during Cancer Progression in Mice with Pten and Smad4 Deletion in the Pulmonary Epithelium
Source: MDPI journal article supplement (doi:10.3390/cells8060615), 2019-06-19
Supplement: s1 [file s1]

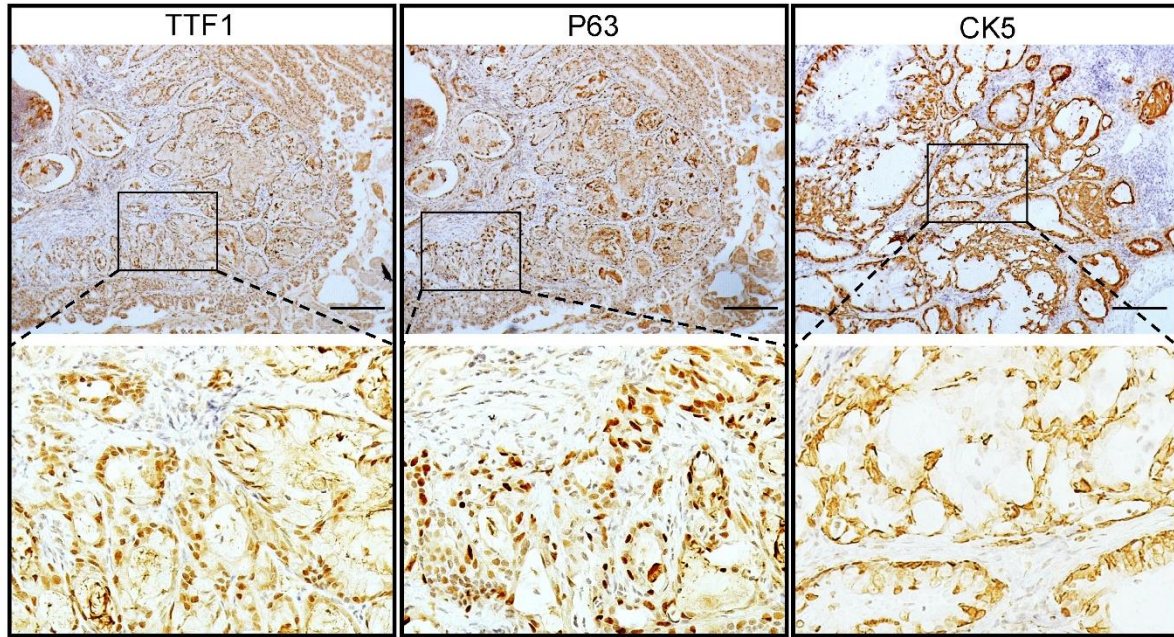

**Figure S1.** Immunohistochemistry analysis of lung tumors in *Pten*<sup>d/d</sup>*Smad4*<sup>d/d</sup> mice at 12–13 months of age. Scale bar, 200µm.

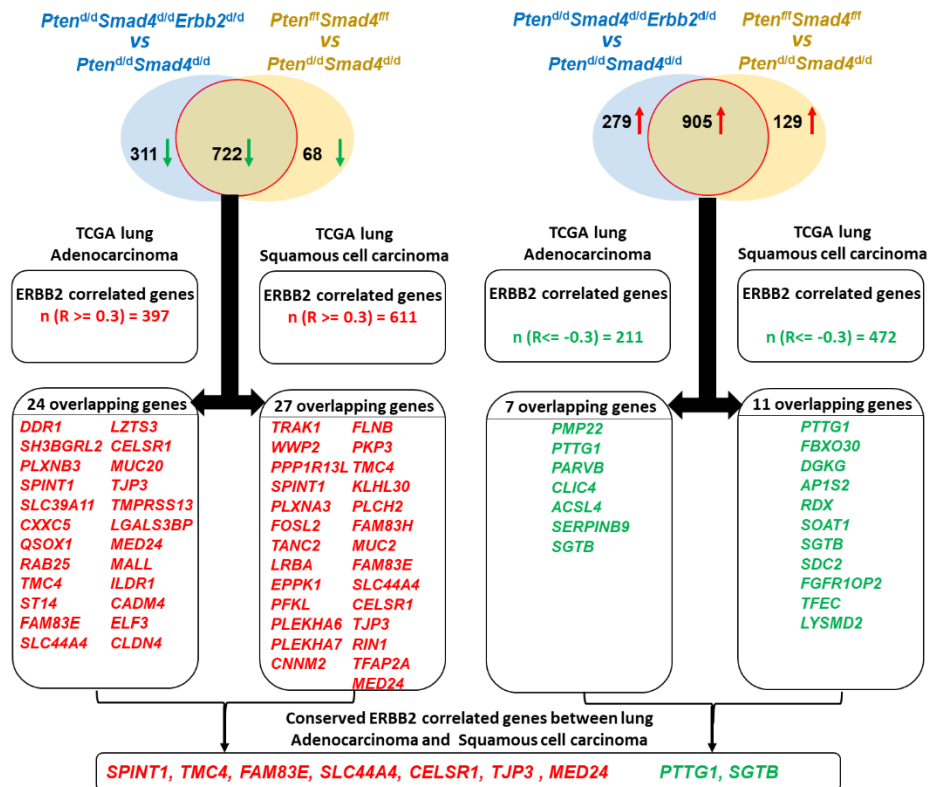

**Figure S2.** The workflow of identification of ERBB2 correlated genes.

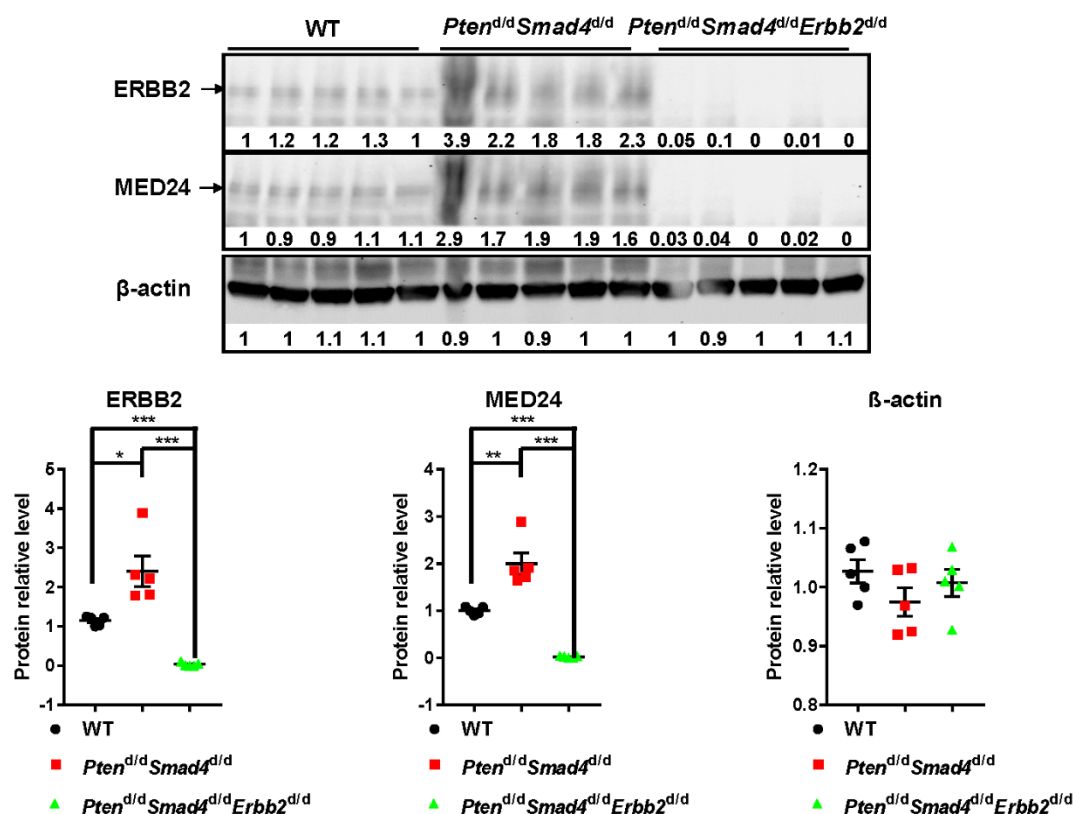

**Figure 3.** Western Blot analysis of protein expression of ERBB2 and MED24 in mice at 12–13 months of age (n = 5). Image J was used to quantify the relative level of protein bands; Each protein band were compared to the first band in the same row, respectively. Dot plot figures (lower panel) were generated based on the quantifications of Western Blot (upper panel).

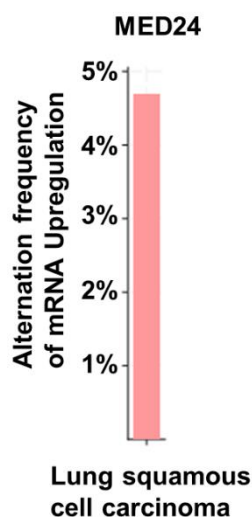

**Figure S4.** Approximately 5% of lung cancer patients have MED24 mRNA upregulation. This is from the TCGA Provisional database (mRNA Expression z-Scores (RNA Seq V2 RSEM); Enter a z-score threshold  $\pm 2.5$ ), and it is the cutoff for the patient groups used in Figure 5F.
